# Supplementary material for: Acetylcholinesterase and Nicotinic Acetylcholine Receptors in Schistosomes and Other Parasitic Helminths
Source: Molecules. 2017 Sep 14;22(9):1550. doi: 10.3390/molecules22091550 (PMC6151654; doi:10.3390/molecules22091550)
Supplement: Supplementary file 1 [file molecules-22-01550-s001.xls]

## Sheet: Sheet1
	Table S1. Amino acid sequences of all the AChEs and nAChRs identified in S. haematobium, S. mansoni and S. japonicum
		AChE	Sequence
	S. haematobium	A_03825	MLNPLKPIKITLNHGGSIIGKEEIVQIDGKEIQVNSFLGIPYASKPIGKLRFAPPIKHPGWKGLYNATKLSATCWQYIFVGFDAVNVAGKMWINNTEMSEDCLYLNVWTPKPSGKNSRFPVMVWIYGGGFTSGSANLQVYNGAILSATQNVIIVSMQYRVGAFGFLRLKPNTTDQTQTSALGNQGLLDQLMALKWVKENIEQFHGDPDQVTIFGESAGAVSVSILWMSPIAQPYFRRAILQSGSLYARWGLDTADEAHEKADIFTQECGCQSPSVDRKASLECLRKLDPLTLVNQLDSINVAIGKRRYDTVKKYLRPKNHQREPFLLSQSTSTRLYFDVPLQPVIDGHLMPKHPDQIFHDKNALKDKPELLIGVNTNEAMFFLLPGISIKDTQFLFPNG…
		KGB33661*	MNDTLKLFIIILIWSQLTLSQLNYCLKPIGCYHDECCFNIIPKTGPICDPIPGCVAYFKPDCCKNSRSIHTDYGIMYGYAISLDNEYGYQDNGKRYIQIWKGIPYAKPPTQKNNLRFHRPIPPIHSNEKYDATYFRSSCSQPNFNTFNEWSKYSYEWYKHFTLGQRNQEGFNDHEDCLYLNIYNLYEIDIGLDYNNNNNNKQYPIIVFFHGIDHLIGSANYYPGHVLAQLGLVVITVNYRLGPFGYLAINKPYLQKNIHMNDISDHDHHDDDVDVDVDVDVDDDEEILMGNYGLWDQIRALEFIHEHADKFQGDRNQITVIGYGSAAADVALHLLSEKSGRRNPPLFHRVILMSGSDQMEGGFVQNINESEAYAKQLAYQVGCDVSSRRSMINCLRSRT…
		KGB33101*	MFLVSPLNFEIFCSCLQLLPVISWADQFVIRTNYGAVSGKQKYIHGKNVFQFLGIPFAKPPIGDLRFRFPEPPDPWSNILDATKPPNTCMQPLPESQEFLDATTRVWLNTTKMSEDCLYLNIWTRANNNYSHDIGDRKHMMLESSAIFGPKGGRPVMVWIHGGSLIRGSSSIEMYNGAYLAGKMNVVVVSIQYRLGPLGFLYLGNDEIPGNQGLMDQVAGLQWVRENIAYFGGNPQQITLFGHSGGVICVALHLISPISNHLFQQAILQSGSPLAWWAVESSHTALEKTRLLAQLSGCNAVTDSNGQYSKELVKCLRSVESETLVINQWHMHLLRNGENSSRTNQLKKLYRNRASHHLLSTAGYYFDVPFKPVVSAPFLPEWPYEVLGSGKLNIRHRIM…
		KGB37011*	MSLGIMKNMNYYLITSFILLNNGLSFKTNTIDNVNNIHLQSSIENTMINNNNSNLVHTDLHNDKTITCLSDNPIVHTSVGIYCGLREIVHWPNGPASMVDVYYGIRYAQSPTGSLRFKKPVEPIPEPKKIFMADKLPSTCPQPKDTMFQNSAAARMWVPNTPMSEDCLFLNIWVPLKESNSSHSNSKEKLAVMLWIYGGSFYMGTATLSVYDARFLAARQNVIVASMNYRLGSFGFLYMNTEEAPGNMGLWDQRLAMKWIKNHIENFGGDSHRITLFGESAGAVSVSTHVVSPWLAKILGCGYRSSMDQIKCLRSKSITEILDAHDTMYDPASYFSVPFPPVLDNNFFPYENSQSFRQLKYLKPSGALMFGINKNEGSYFLLYAFVSNSKWMKNLTDLP…
		AAO49838*	MSLGIMKNMNYYLITSFILLNNGLSFKTNTIDNVNNIHLQSSIENTMINNNNSNLVHTDLHNDKTITCLSDNPIVHTSVGIYCGLREIVHWPNGPASMVDVYYGIRYAQSPTGSLRFKKPVEPIPEPKKIFMADKLPSTCPQPKDTMFQNSAAARMWVPNTPMSEDCLFLNIWVPLKESNSSHSNSKEKLAVMLWIYGGSFYMGTATLSVYDARFLAARQNVIVASMNYRLGSFGFLYMNTEEAPGNMGLWDQRLAMKWIKNHIENFGGDPHRITLFGESAGAVSVSTHVVSPWSHSYYNNAIMQSGSIFSNWGLATSEVSLNQTQRLAKILGCGYRSSMDQIKCLRSKSITEILDAHDTMYDPASYFSVPFPPVLDNNFFPYENSQSFRQLKYLKPSG…
	S. mansoni	AAQ14321*[41]	MSYGIVMNMNLCIITSFLLLDPVLSSRLNAFQNVNNVLIPSIENTIINNSIAADIDLHNDKTTICSSDNPVVHTSVGIYCGLREIVHWPNGPASMVDVYYGIRYAQSPTGSLRFKKPVEPIPEPKKIFMADKLPPTCPQPKDTMFQNSAAARMWVPNTPMSEDCLFLNIWVPIKESNGSHPNSKEKLAVMLWIYGGSFYMGTSTLSVYDARFLAARQNIIVASMNYRLGSFGFLYMNTEEAPGNMGLWDQRLAMKWIKDHIEHFGGDPYRITLFGESAGAVSVSTHVVSPWSHSYYNNAIMQSGSIFSNWGLATSEVSLNQTQRLAKILGCGYRSSNDQIKCLRSKSITEILDAHDTMYDPASYFSVPFPPVLDNNFFPYENSQSFRQLKYLKPSGALM…
	S. japonicum	Sjp_0045440	MLFTITHLFILTLHSIIPPVKPDIQTYINVELSHGGTIRGIEETVNIDGDEFKVNRFLGIPYAKPPIGKLRFAPPEKHPGWNGVRNATNYSPTCWQYIFTGFDVNNPAGKMWINNTEMSEDCLYLNVWVPNNTVNDRRLLPVMVWIYGGGFTSGSANLQVYNGAILSATQNVIIVSMQYRVGAFGFLRLDPSIANNDEMHQNKSGSANNSIALGNQGILDQHMALMWVKENIQRLHGDPNQVTIFGESAGAVSISILWMSPIAQSYFQRAILQSGSLYARWGLDNAQEAHEKAVEHTGPYDRHNINACLCQSSDCLDSVA
		Sjp_0070510#	MAFALACGCKSPSLDRKASLECLQQLDPLTLINQLDSINAAIGKRRYNTVHKCLHPTTHKNESFLLGQSTSTRLYFDVPFQPVIDGYVIPKHPDQMFMEYNTNASKEKPEILIGVNENEALFFLLPGLSIKNTQFLYPNGTAHMPNSIELAGNKQSFNKDDELADFFWITTTQILDESHMRLGLAKLPSYYYNLPISSSSIDGYYDPDTVKMSGEDVIKRLDEFVGDLDFACPTLNFAEHVARLPNAKVFLYHFNKRTNSLPLPKWTGVMHGYEIEYIFGIPYDKEFSRNFYNFTDNEKQLSLRIMKLWSNFAKTGHPSKSETGEILQPEWPLFRRTDRLVTNDYDHFIIEDKFKQGSGLRRERCRFWLHEMSDMTQILRNTCQLSSSDKIFSDLSKRQ…
		Sjp_0036280#	MIIYSRIFIVYKLIFYLPLIKIAKTQNWWNFESQINPFKLPIFTPLPNQRFTHVPEINKYGPMPNDVVVDIPKAGIGKFIGFSTTINYDYTWSQWPPFNGRLVNIFLGIPYAAPPIDGQRFRVPVPAYLDTRYPWFAKRFRSACMQPHIWLSRFIPGFTDISEDCLYLNIYSPNPSLSNIIKLSLKMSKEDKSKFLIFMKKLIFTIQNTLDDPNIRYPVIVHIHGGSYVYGSSHMYPGLALASKGIVVVTFNYRLGPFGNESHLFIHLFPFQLGFLSTGDHASVGNYGLWDQLLAITWVKENIEWFRGDPDRITLMGESAGAASVGLHLVSPLTRERLKNNQDV
		ANH56887*[20]	MNMIYIAINYYIILHSFLLCNVETLQNVNKVYMTSIQNTVINKSISGDSDVHNEKTSICSSDNPITYTSVGIYCGQREIVHWPNGPASIVDVYYGIRYAQSPTGSLRFRKPVEPIPEPKTIFMADKLPASCPQPKDTMFQNSAAARMWVPNTPMSEDCLFLNIWVPLRESNESHSNSKEKLAVMLWIYGGSFYMGTATLSVYDARFLAARQNIIVASMNYRLGSFGFLYMNTEEAPGNMGLWDQRLAMKWIKDHIEDFGGDPYRITLFGESAGAVSVSTHVVSPWSHSYYNNAIMQSGSIFSNWGLATSEISLNQTQRLAKILGCVYPSPSDQIKCLRSKSITEILDAHDTMYDPASYFSVPFPPVLDNNFFPYENSQSFRQLRHLKPSGALMFGINKN…
		nAchR	Sequence
	S. haematobium	AAR84357*	MLIMNSIIKLCFGLFMFIDVVLSGLYEKRLLKYLFDSSRPDAHNPIERPSANDTETLNVSVKFFLNQVMDVDEKNQVLTTIIWMDLIWNDYHFLWNPKEFGNITTLNLPYTAVWRPDILLYNCADEKFDRTFPTNTIIKHDGTVQWMPPGLFKSTCNIDILWFPFDEQSCILKFGSWTYYGDQINFQLQCINASQPDCTQVGTVDLSEYSRNGEFHLSGSSVRRYAQRYECCDYDFVDVKIAITLQRRALYYVFNLIVPCLLISGMALMVFMLPPDAGEKISLGVTILLSLTMFLQLVADKLPQTSEAIPLIGIYFSCTMFMCSLSIVFTVLVLNYHHRSADCIAVPAWIRNIVNTYLAKLMCMEPPKRSQIIEVEDISSSISDNFMENYPNTKKSQNE…
		AAR84358*	MNTLCHILCYIVLYQILCITWIGKVDSGHSEKRLLKYLFDQKRWDAHNPMERPVSVDGKPVQVFLKCFLNQIMDVDEKNQVLSTIIWLDLKWSDYHFHWNASDYENIRQINLPPERIWKPDILLYNSASEKFDQIFPTKVIVRNTGNIQWVPPGLFHSICDIEVNWFPFDSQNCIMKLGTWTYQGNTVDLKLQCDNETEDVDQPCHYMNDVDLSTYLAHSEWALESASIKRNIQTYGGEDQTYIDVTIYVYMQRRALYYMFNIIIPCMIMSMMALLVFTLPPEANEKIVLGVTTLLSLTMLLQLVADKLPQTSSGNPVLVLYFTCTMILCSLSLVCAVVLLNCHHHTGGIVYVPWWIETLINIWLASILRIDHDLSDPNNNDNNNHHGDNNNNKTEPNL…
		AAX59989*	MLFSSGCIVVLVYLFLSPTVRSRNHAETESSMEKSLIRVILERYKQNGVVGRPVNNSRVKMVVQYGLQMIQLLGLDENKQVLRTNCWAVYRWSDSLLKWNASQYGGIKELRIFPHQIWTPDIKLYNFADERLQEFREGRLVVDSSGNILWIQQALFRSTCQVEITYFPFDSQVCMLEFGSMAYDKTQLDLDWWIPDGSDTPMPYVDFSDYVPANDWFTDGEAERHIRHEDRVHQLRSVKRYRVREHLIGSTKHERYYPVLRYLIRIYRNPSFHLFILIVPCLLLSLLSLVVFWLPPDSAAKMMLGINIFVGFFVLLLLLAKSMPSAIKNFPIIGIFFCLNMVMVTLSIFMATWVVNLFYKGNEGQAVPFWIRRFIIDGLGRMLGIRQIIPLIDKSQRLD…
		A_01504	MASYFYCLNMTLLSLSTFASTIVVHLHFQRVKSKHVPPWLIKVVRFFATLLHVSKLEPPVVADTNQKLSVVEAQIKNAKMKQSIKSENLLDTWSSNQQLPPSNPQSNLIHSAGVETQWDYNKISSTEEYLLNPNELSVLQKQQLSMLSDGSQISYSTGVNGCQFPSHHYPNQNYLQQKSIPWGDYATNQPNKSGSVKIHDKLLKKFLQSKQQSRRSTIQLGFNLGDLCNALKQLMLKIAKKDEIAQRDREWRGRSHTVNEIIAMHQEAYDIRNQAVAKQCANRLSDSDEVIRKPNRPSQHRTRFLDPPTNIDMPSRYHPVPKYPPEETLRGVYEHTGGRNLALMAALENTLEEALKVEKDRRLTILDGVNKPNKPDYFSPQYERDYRWQAAIRAYEIEQ…
		A_01761	YYLFYSADERLNERRPCDARIFSDGSVLWNPMGIFKSTCSVDIKYFPFDRQKCVLKFGPWSYDGFRVNISFYDGERNFRLLNYITNPEWNLLNSSAVFTEISYPCCPEKYPDITFHVWIKRKSAFYTYILIIPSILLSSLTSVIFWLPPHSPAKIVLGKYYQITSLKNIHTTQFNKFYDVPKTASNITRKPQMNRIYQLQYEVYPM
		B_00805	LKIGEIDTLKELYYADAFLQAKWREPKLDGHTAEELSITELEQYWNPLLYIDNILSETKDTQWIMAVRNEYGEVYLMERRRIKGVFLETLELNDFPLDVQDLTITVTTERPDTEVDIIPDQVEMSAINIQTFVDQQEWKLHEHVEIKKRIIKQEYSSSMKSHPCLSVTCRAARRPGYFYWNVFLIMFMISGLAFATFAVSPDKAELRLRLSFTLILTSVTFKYVITQSLPKISYLTYMDKYVLMSLFILCIISIWHAVVTLIGLDFDLPDSPGFGSSLPSTSTTTTTSTTNTTATTTSAIISPNLNVNTTNQSPRLYFPNHNKSESIQS
		A_05298	MKQTYSNIQWIHSIYNNKSLIKNDSNLTNHYSRSYHHLSLINNNNSFNTIQSLDTNLNFNWESNLNRITTDWAEKRLIKDLLYDYEKQSRPVVDGLTPRVYVTPIQITQQITVEFGLELLQILDLDEMDQILTTSVRSLYKWIDHNLIWNPNEYGGIDSVTIPVEYLWIPDISLYN
		A_06497	MKRWTDPRLTWDPEEFSEIQEVSLPTTNLWIPDVGVMNGKASTDFDFSAGVRGRVTVSNDGSVTWLHGAVLDVTCPLDVSFFPFDYQTCFLILVPWQSGEQQLLLQPFTRVSAVDNSYLPNSNVSEWEIQSVHFVRKKYRSDMNVTYQYVSIAIHLKRQPLYFIVLVLVPFSMLSALACLIFTLDDTGDRLSVALSLVLSMTMYVVIVSTNAPRSMRTLPVLGIFLLDQLGLLSIATILAVMNNKLYQSTELLTWQDFIYAISGTGQGKRRNSEPYSEHLYVNRHMHENHNYNDRYKTPRNNTNRQEPKYKSSLQQTDQLIEKSISRQQYYFKKYCKPVKLLSRKSNKTVNNNNSNSNCGKSNNQSNRYFPIHPDSGHFINHCDSEVILNATNFTSDVK…
		A_06364	MPDSAENYASDDSNTGIYYNLHRELLLTDGVYVGVHRPVFLLSEKLCQSYGIVQRKYVIEGSVPLIQLNYSELSSQILVPREQIEDCIQNVCATLGQYLYHEKFAEVIFNDIGKLRINKKKSKFCFFNSFLSELDNTGRLAQTFQNRPESSDGVTTDRSVLSNRSHGSISSVKKRLATIDEDKPSTSPVPPLSEKTHQSKRQDDQSSTSDKVSWIDDRDVVKCNTDSLASCIHTSPIHRNNQVSTVEEVPEIVGQHESFLEEESNANPTISSPPSTVADNPELNQKSFISPDLPKLYTTDLEQYVKQSSKVKSHCSASHTSSKLSDCSRSTLSSVRSIKINIEELEKRIPKTDDNCNHALSKNNGLCYLCHQRRIRNIHIDLKDEIKKREQAEDELLRI…
		A_02378	MFSANFLHPLESQYTDKWTEKSLIKDLLRDYEKRARPVVDGMSPEITVGNTTVQQITVAFGLGLIQILQLNENEQILTVSVRSLYRWTDYHLVWNPEEYENITHINIPTDKIWLPDIALYNYADERLEERRECAVRVDHNGVVEWHPMAIYKSTCPVKIKYFPYDKQVCYLRFGPWTFDSARVNITFYDEGFSMKDYVESPEWSVLNYWQKHRTHAYPCCPEQYSDTLFFIKIERQAAYYNYILILPCFLLSSLTLVLFWLPPETPAKMVLGMNIFLAFFLLLLLLENSIPSASSSFPLIGNYYCINMTLVTLSTFLCLIVVNLHFRGDRRTEVPFWLRKLALHHGSRILLVNVGPPGGPPPPTSTSSNKPTEKPITNMNSVHNFMTSPDNFLRGNLFD…
	S. mansoni	AAR84361*	MHSIIKIFGLFMLFDIVYCGLYEKRLLKYLFDSSRPDAHNPIERPSANDTETLNVSVKFFLNQVMDVDEKNQVLTTIIWMDLIWNDYHFLWNPKEFGNITTLNLPYTAVWRPDILLYNCADEKFDRTFPTNTIIKHDGTVQWMPPGLFKSTCNIDILWFPFDEQSCILKFGSWTYYGDQINFQLQCINASQPDCTQVGTVDLSEYSRNGEFHLSGSSVRRYAQRYECCDYDFVDVKIAITLQRRALYYVFNLIVPCLLISGMALMVFMLPPDAGEKISLGVTILLSLTMFLQLVADKLPQTSEAIPLIGIYFSCTMFMCSLSIVFTVLVLNYHHRSADCVSVPAWIRNIVNTYLAKLMCMEPPKRSQIIEVEDISSSISDNFMENIKKSQSETLFKGGE…
		AAR84362*	MYKLYNILYHILLISWIDKVVLSGHSEKRLLKYLFDQKRWDAHNPMERPVSVDGKAVQVFLKCFLNQIMDVDEKNQVLSTILWLDLKWSDYHFHWNASDYENIRQINLPPERIWKPDILLYNSASEKFDQIFPTKVIVRNNGHIQWVPPGLFHSICDIEVNWFPFDSQNCIMKLGTWTYQGNTVDLKLQCDNETEDVDQPCHYMNDVDLSAYLAHSEWALESASIKRNIQTHGGEDQTYIDVTIYVYMQRRALYYMFNIIIPCMIMSMMALLVFTLPPEANEKIVLGVTTLLSLTMLLQLVADKLPQTSSGNPVLVLYFTCTMILCSLSLVCAVVLLNCHHHTGGIVYVPWWIEILINTWLASILRIDHDLTDPSNNNMDEKNEKILKNSKEKLILSEN…
		Smp_176310	MDLIYLIYQLIMFYANFLHPLESQYTDKWTEKSLIKDLLRDYEKRARPVVDGMSPEITVGNTTVQQITVAFGLGLIQILQLNENEQILTVSVRSLYRWTDYHLVWNPEEYENITHINIPTDKIWLPDIALYNYADERLEERRECAVRVDHNGVVEWHPMAIYKSTCPVKIKYFPYDKQVCYLRFGPWTFDSARVNITFYDEGFSMKDYVESPEWSVLNYWQKHRTHAYPCCPEQYSDTLFFIKIERQAAYYNYILILPCFLLSSLTLVLFWLPPETPAKMVLGMNIFLAFFLLLLLLENSIPSASSSFPLIGNYYCINMTLVTLSTFLCLIVVNLHFRGDRRTEVPFWLRKLALHHGSRILLVNVGPPGGPPPPTSASSNKTSEKPITNMNSVHNFMKS…
		Smp_142690	MDELGISLNTPGARDQLPMAVSRRELNEELNLDDIMTKNSPSGNIKLVDAKCTEKLTKSQRKRHKRQEKLKLRKAAKASIPKPEPKEPRTSSSVVLPERKAYASSLDTDEKLLDAIRNRLVEMYQHTLTIRPLPRNCPVSLIKDLFPSSVNVRIPQKCNSRFAFAKFRNHDELVAAQKSVSGKLLNSKEIKTEICSLHGPDNVDKNKWTEPLQRTLSDFDMRSLHVLHLPRATTRFDLAQVFPKAVGIRMPTYDDGSCRGYCTLTYHSRHTALKDFELKHGTFIHGESIYVMFLLKNPKKISIRNAKRQASDIYQMDVDSTPTPHKDKCAKAVVDHPIPMSIDSFDPEFKIAKSLAKSGKPLKKKSKVATVHRDIPDPLVNIKYQLEEKSVKRKSSSKN…
		Smp_119340	MRRRTLYYLFNIIFPCLWLTVLSLVSFWLPPDSGEKITLGITVLLAFSVFMLLIAENMPATSEFVPLIGK
		Smp_135040	MSGNYTSTSSSTTTSPSLTTTTMSNHQWIGNKSFYIHDTTNSTLSNMTEGYEPFSNYNTKITSKSYDYSKPPQPPPPPPPPQQQQQNDAFHSNIPRIVLSPQLQRPIRNDQPIHETYFQSKQSYSSLFVQNRLETDHKSIIRQQNPYINHIQSYTKSSIQIMPESIISMNRLCKNQYQSNLNPCLLSYESTKPIESYLRPSTNVLIPKRTLSLEIPNHYLINTNKIMNPPPPPRRTISPIKCCILENHNNNNNNNNNEEEPDIWNIGSSSGFDQSITFRHRRSRVSRSSFYDQKYKLLNKSKHHGDMNVINSECGSLLSTDEETVSLNTIDSEENMNVLNRYSNSLQPLNRNKQEIYGSTKTLIPSSKSWKFHHQDYPLSSSCKSVHWNKSQSNLMNKR…
		Smp_012000	MRWTDPRLTWDPEEFSEIQEVSLPTTNLWIPDVGVMNGKASTDFDFSAGVRGRVTVSNDGSVTWLHGAVLDVTCPLDVSFFPFDYQTCFLILVPWQSGEQQLLLQPFTHGSAVDNSYLPNSNVSEWEIQSVHFVRKKYRSDMNVTYQYVSIAIHLKRQPLYFIVLVLVPFSMLSALACLIFTLDDTGDRLSVALSLVLSMTMYVVIVSTNAPRSMRTLPVLGIFLLDQLGLLSIATILAVMNNKLYQSTELLNWQDFIYAISGTGQGKRRNSEPYSEHLYVNRHIHDNHNYNNRNKTSRNNTNRQEPKYKSSLQQTDQLIEKSTSRQQYYFKKYCKPVKLLSRKSNKTVNTNSNSNCGKSNNQSNRYFPIHPDSGHFINHCDPEVILNATNLTSDVKYR…
		Smp_101990	MDHRLKWEPSDFGDLQNILIFKSKQLWRPDLAFGNRKKNGLFDLASSSNASRLMIESNGHVTWLHGSVLELSCPLDMTKLPFDRQKCYLVLTTLYSTIKQLEINLKIDHLSIDNSFMPNANHSEWIIEEIGYHSSVYLRQTNSKYQYLVISIKLKHEPLYFVTFVVAPFTLISTLTCSIFTLSCPSDRLATALSLFFGATVYVITVSSNTPRSVSQIPLLGEYILSINRLLNFITFRVEQLIYYNF
		Smp_037960	MDLKYCFILLFGIINEVLQVSGIAPKGHPREMKTKSVEKNLIRMLLNRYEQFGVIGRPVNDSKIKVDVRYGLQLFQILDLDENKQILRTNCWSMYKWTDSLLRWNESDYGDIKTVRIFPSQIWTPDIKLYNFADERLREHRDARVVVSSNGEMLWVPQALFKSTCEVEITYFPFDTQICMLEFGSWTYDKTQMDILWWIPDSPPIEEMPYLDFSDYVPSNEWRTDGEKEREVHHVNRTIQIRSVKKHRRRSQTVGNEVITREYPVLRYLIRLRRNPSFYVFMLVIPCVLLSSLTLVVFCMNIFVAFFVLLLLLAESTPSAVKNFPLIGVYFCLNMIMITLSTFLATLVIHLYFRGDRNGSVPYVLRRIIIEGIGRLTLVRQRIPLPEMKKPIRPSIIKP…
		Smp_157790	MSLSLIQILDLDEKNQVLTTSVWLNYRWTDHILKWNPENYSQIQEVRVPYRHIWTPDIVLYNYADERLKEMRDAMVIVQHTGELTWIPPAIFKSSCKIDIKSFPFDEQTCHLKFGSWTYDGNKLDVTFINNEAQVLLSDYTESNEWEVIARPALRNVKSYPCCPEFYPDLTFFLFLRRNAAFFSYILVLPCVLLASLTLVIFWLPPESPAKMVLGMNIFVAFFLLLLLLADSTPQASNSVPYIGYYYCLNMILITLSSFLSVFVINLYFRGDKRNRVPQCLRRICHILNGFCDGKCSCKEGDQNTPMGVVISNSNSTTASQTKNDYSSQLVQMKKSALVNSNNEQQDISSYTGAVTGMKRSKKGKARFAMVEENNGLKTLIVDNYDYDTNTIQKKRYRP…
		Smp_132070.1	MKKHVIPSSEKRLIKQLIDNYEKAGKIGRPVKNTKDRVVVGYGLSLFQLLDLDEKNQILTINVWAKYTWIDQLLRWDPANYSNIREVRIPPSVIWTPDIKRDVMLNVDYMGRVFWSPPAIFKSNCPIDIKNFPFDYQHCFLKFASWTYNSEQLDLQFLDNRTEVDIDQYTSSNEWSLVARPAYRFVMLSDECGKEIPDLTFFLLYLLVFPCVLLSVITTVIFWLPPQIPAKMILSMNIFVAFSLLLKILAVSTPSASTIVPYLGYFYCLNMTLLSLSTFASTIVVHLHFQRVKSKHVPPWLIKVVRFFATLLHVSKLEPPVVADANQKLSAVEAQIKNAKMKQSVKSENLLDTWSSNQQLPPSNPQSNLIHSVGVETQWDYNKISSPEEYLLNPNELSV…
		Smp_132070.2	MKKHVIPSSEKRLIKQLIDNYEKAGKIGRPVKNTKDRVVVGYGLSLFQLLDLDEKNQILTINVWAKYTWIDQLLRWDPANYSNIREVRIPPSVIWTPDIKRDVMLNVDYMGRVFWSPPAIFKSNCPIDIKNFPFDYQHCFLKFASWTYNSEQLDLQFLDNRTEVDIDQYTSSNEWSLVARPAYRFVMLSDECGKEIPDLTFFLLYLLVFPCVLLSVITTVIFWLPPQIPAKMILSMNIFVAFSLLLKILAVSTPSASTIVPYLGYFYCLNMTLLSLSTFASTIVVHLHFQRVKSKHVPPWLIKVVRFFATLLHVSKLEPPVVADANQKLSAVEAQIKNAKMKQSVKSENLLDTWSSNQQLPPSNPQSNLIHSVGVETQWDYNKISSPEEYLLNPNELSV…
		Smp_180570	MNNYESSVRPLKNISEKLTVKISIRLQQISGLDERNQVLTTILFLEQIWEDEYLKWNESEFGNVRTLRIPAKQVWTPDTYVFNNADHTSSGFLEGVYVLVHSSGRISWPIPVQLKTFCQVDITLFPFDQQNCEIQFGSWMYTSDWIEYKFQTNQHHKSTTTTDKNWKYTTKLLPSLVSLMLNKSNRHIYDNKLDSRQTDLVLKLFLQRRSFFYIWNIVIPCILLTLLTLITFWTPINSGEKVTLGLSVFLAFSMFMMLIAERVPPTAKNIPLIGVYMTSVMSITTGTVVVCVIVINLDAKGEKLSRAPKWLRRITQFGLCQFFYKENCHDMNESAAISSLDRSAYIDYYLFINQRLLLQAQFIPDYKNDEHGLHYIIIGL
		Smp_197600	MNYMSLKFEETYDRVMFFDELHMKEWIDERLTWNPQDYNNLSRIRIPCQKLWLPDIVLYNSADDYKTDYMQSKAMVQYNGNVFWPPPAKLRSTCKIDITYFPFDDQSCTMKFGSWTYDGWQVNVIKRLVNIYT
		Smp_142700	MLLNRYEQFGIIGRPVNDSKIKVDVRYGLQLFQILDLDENKQILRTNCWCMHGMNIFVAFFVLLLLLAESTPSAVKNFPLIGVFFCLNMIMITLSTFLATMVIHLYFRGDRKGAVPYFLRRIIIEGIGRLTLVRQRIPLSDVKNSKRNVFAKYHKKTLISQISPAKTKQACQNRYFGGGFFPQCNDPVNHPACGDQYLENITTNWSGSTEFQTLKEYSGKSCPHMMRTSIKVNNQIPEILQQIMHNDNQINNYPFRTINYDESEGFNSTTTLERDVRELKKYVKIVVNRQKETIHKSLIAMEWRTLAIVLDRLFFFIYITTILIAVVVSVPYNIEIEIPAEFRDSEE
		Smp_031680	MNSIIKIFGLFMLFDIVYCGLYEKRLLKYLFDSSRPDAHNPIERPSANDTETLNVSVKFFLNQVMDVDEKNQVLTTIIWMDLIWNDYHFLWNPKEFGNITTLNLPYTAVWRPDILLYNCADEKFDRTFPTNTIIKHDGTVQWMPPGLFKSTCNIDILWFPFDEQSCILKFGSWTYYGDQINFQLQCINASQPDCTQVGTVDLSEYSRNGEFHLSGSSVRRYAQRYECCDYDFVDVKIAITLQRRALYYVFNLIVPCLLISGMALMVFMLPPDAGEKISLGVTILLSLTMFLQLVADKLPQTSEAIPLIGIYFSCTMFMCSLSIVFTVLVLNYHHRSADCVSVPAWIRNIVNTYLAKLMCMEPPKRSQIIEVEDISSSISDNFMENIKKSQSETLFKGGE…
		Smp_139330	MYKLYNILYHILLISWIDKVVLSGHSEKRLLKYLFDQKRWDAHNPMERPVSVDGKAVQVFLKCFLNQIMDVDEKNQVLSTILWLDLKWSDYHFHWNASDYENIRQINLPPERIWKPDILLYNSASEKFDQIFPTKVIVRNNGHIQWVPPGLFHSICDIEVNWFPFDSQNCIMKLGTWTYQGNTVDLKLQCDNETEDVDQPCHYMNDVDLSAYLAHSEWALESASIKRNIQTYGGEDQTYIDVTIYVYMQRRALYYMFNIIIPCMIMSMMALLVFTLPPEANEKIVLGVTTLLSLTMLLQLVADKLPQTSSGNPVLVLYFTCTMILCSLSLVCAVVLLNCHHHTGGIVYVPWWIEILINTWLASILRIDHDLTDPSNNNMDEKNEKILKNSKEKLIPSEN…
	S. japonicum	Sjp_0071780	MSNYDHSIVYNYNLFKELSITELEQYWNPLLYIDNILSETKDTQWIMAVRSENGEVYLMERRRIKGVFLETLELNDFPLDVQDLTITVTTERPDTEVDIIPDQVEMSAINIQTFVDQQEMCSFICSTHYMDVSVDLTDKFKAIKEISGHLN
		Sjp_0034800#	MLQSLFYQLIINFIILHHHITHYQCYELSEKMIVQQLLNNYETASRPVKLGNKTLNTSIRVILQQVVDLDEKNQILLASLLVQLKWIDETIKYRILQLNQFYHQSYNNEFKKYFKSIVLPSSRVWTPDLYVYNNADDGKNGLLDVSQSRVRVNQEGEVTWNLPVSTRSSCNVDVLYFPFDHQLCNIQLASWTYDQSQLQLNIIPENTTVMLSKLIENVELAIPEVKIFKDYRITVGGQNITQINLRIHIYRRAVFYTYTVIAPSILLCVLTVFSFWLPTGNVRKIDMGLTVFLFLYFLQITIAENTPESNSTPLLGTFLTMVMTLNSVSLIFATIVLHIHICSKTETCPTPHPILWCFVTRLLGYLAMIPYKTTNQTIHIPSRYSQEDTDIDYNDNDDD…
		Sjp_0082390	MLKLYMRIFYIIFQQFLFISWIDEVISGHSEKRLLKYLFDQKRWDAHNPMERPVSVDGKPLKVFLKCFLNQIMDVDEKNQILATIMWLDLKWSDYHFQWNASDYENIRQINLPPERMWKPDILLYNSASEKFDQVFPTKVIVRNTGSIQWVPPGLFHSICDIEVNWFPFDSQNCIMKLGTWTYQGNTVDLKLQCDNDTEDGIIDDQPCHYMNDVDLSTYLAHSEWALEKYIEDGFEEIDIEYN
		Sjp_0131150	MKRWTDPRLTWNPEEFSEIQEVSLPTTNLWIPDVGVMNGKASTDFDFSAGVRGRVTVNNDGSVTWLHGAVLDVTCPLDVSFFPFDYQTCFLILVPWQSGEQQLLLQPFTHGSAVDNSYLPNSNVSEWEIQSVHFVRKKYRSDMNVTYQYVSIAIHLKRQPLYFIVLVLVPFSMLSALACLIFTLDDTGDRLSVALSLVLSMTMYVVIVSTNAPRSMRTLPVLGIFLLDQLGLLSIATILAVMNNKLYQSKELISWQDFIYAISGTGQGKRRGSEPYSDHLYINRHTHYNHNYNDRNKSSHCNINRQEPEYKLSLQQANQLLEKSTTQQQNYFKKYCRPVKLLSRKSSKTNNNSSGGKSKINSNRYFPIHHEGGHFMDYYDSEIILNATNFPSDGKFRPV…
		Sjp_0015560	MIGHGRRRGKYTNSHVNQQNIFIPNEQQVYRYIMKNYESSVRPLKNISEKLTVKISIRLQQIGGLNERNQVLTTILFLEQIWEDDYLKWNESEFGNVRTLRIPAKQVWTPDTYVFNNADHTNSGFLEGIYVIIHSSGKVSWPIPVQLKTSVSPSSSSSSLLSNNSTSYATLEKTDENVKEDDEVTNNFDDDYLTRNALDISSYWDSTDWMLKQSSLSYTYRSTDQLTVWKPTTKSTGILNIESHDNKLNIKKQTDLVLKLFLQRRSFFYIWNIVIPCILLTLLTLVTFWTPIDSGEKITLGLSVFLAFSMFMMLIAERVPPTSKNIPLIGVYMTSVMTLTTGSVVVCVIVINLDSRGEKLTRVPKLLRRLSKLSIFQLFYKENYNDMSKSAYVSSMVEK…
		Sjp_0115170	MTLVTLSTFLCLIVVNLHFRGDRRTEVPFWLRKLALHHGSRILLVNVGPPGGPPPAPPASSNKTAEKTTMNMNSAYNFMMPPTETLLHGDSFHPKMFPPTRGNFSEKFNDNRFGKPYANMFYHPECCYNSSRQPHIKSQFLTGSPNQKLPGCYYQDNESEMKHASQFSRRQAQVNDQTTPCSFCPACAGLAAAAAAASVRAPNDVDPGYYGEQQYSMQTTPKNHFTQDSTNEFSAVWAAAINDSKIHQKRLSTSGLIENNRQCEDEEDLTDDEDDEPHPTRSRNMGSDLEHFLLQCIKPGTSQKAVSAATAKWNSSVQNTQPTSPLYPFTSPICQDDSENEQYKVNLPRWSSAGHSIGGRSNRGLNHNSDKEINHDPDDVNLWRANSSSFISPKFKKSS…
		Sjp_0066940	MDILWWIPDSVPLVEMPYLDFSDYVPSNEWCTDGEKERDVHHINRTIQIRSVKKHRRRSQTVGNEVITREYPVLRYLVRLRRNPSFYVFMLVIPCVLLSSLTLVVFWLPPESPAKMMLGMNIFVAFFVLLLLLAESTPSAVKNFPLIGVFFCLNMIMITLSTFLATMVIHLYFRGDRKGAVPLFLRRIIIEGIGRLTLVRQRIPLSDINLKRNVTTKCHKTTPISQIRSVKCKQDSQNTSQNRRNRCSRSGLFPPFEEFVGHPACEGQYMESVNGNWFGSTEFQTHQRYSRKSYSHMSGAPSKVSHEIPEMAQQNMNYDNGTKQYSFGMINYEAENLNSTSTLERDVRELKKYVKMVVNRQKETAHKSLIAMEWRTLAIVLDRLFFFIYVTTILIAVVV…
